# Supplementary material for: Long-term sea surface temperature time series from Malin Head, Ireland
Source: Copernicus journal article supplement (doi:10.5194/essd-18-333-2026), 2026-01-13
Supplement: Supplementary file 1 [file TableS1_with caption.xlsx]

## Sheet: Sheet1
	Supplementary Table S1: Mean diurnal signal values per month, per hour
	Time (UTC)	Jan	Feb	Mar	Apr	May	Jun	Jul	Aug	Sep	Oct	Nov	Dec
	00:00:00	-0.0293568	-0.0373828	-0.0278377	-0.0330462	-0.0357055	-0.0503611	-0.0191073	-0.0101622	-0.0269368	-0.0488693	-0.0444658	-0.0300054
	01:00:00	-0.0406449	-0.0544367	-0.0596537	-0.0779626	-0.0817902	-0.078539	-0.0517147	-0.0483637	-0.0634635	-0.0682151	-0.056466	-0.033297
	02:00:00	-0.0428037	-0.0663462	-0.0905544	-0.122639	-0.126249	-0.108248	-0.0877253	-0.0848545	-0.0928535	-0.0739151	-0.0600444	-0.0327078
	03:00:00	-0.0369982	-0.0655202	-0.113175	-0.16181	-0.16773	-0.138997	-0.124904	-0.118771	-0.11482	-0.0761483	-0.044237	-0.0286292
	04:00:00	-0.032987	-0.0580758	-0.126338	-0.195766	-0.204892	-0.169559	-0.162767	-0.148354	-0.125815	-0.0780965	-0.038315	-0.0187435
	05:00:00	-0.0293879	-0.0579693	-0.136921	-0.222736	-0.235396	-0.194717	-0.1913	-0.176184	-0.139795	-0.0757363	-0.0320449	-0.00188792
	06:00:00	-0.0189973	-0.0587654	-0.148398	-0.244369	-0.257362	-0.216977	-0.209596	-0.194836	-0.150007	-0.0832952	-0.0322763	-0.0036364
	07:00:00	-0.0174397	-0.0694164	-0.157111	-0.246003	-0.252483	-0.21956	-0.213303	-0.20071	-0.150133	-0.0892856	-0.0331688	-0.0112335
	08:00:00	-0.0236815	-0.0765097	-0.158111	-0.228928	-0.227182	-0.192729	-0.19344	-0.190775	-0.151842	-0.0959157	-0.038839	-0.0111861
	09:00:00	-0.0304347	-0.0818629	-0.146966	-0.18174	-0.168931	-0.143864	-0.150197	-0.157713	-0.141367	-0.08914	-0.0412936	-0.0168817
	10:00:00	-0.0233455	-0.0720691	-0.103442	-0.102811	-0.0815586	-0.0763969	-0.0833094	-0.0963591	-0.0972232	-0.0691334	-0.0404705	-0.0216607
	11:00:00	-0.0148714	-0.041536	-0.0338052	0.00989826	0.0187752	0.00604445	-0.00479475	-0.014996	-0.0285582	-0.0274142	-0.0241878	-0.0138831
	12:00:00	6.6886e-05	0.0095202	0.0469337	0.116934	0.131308	0.0929616	0.0712403	0.0720961	0.0484241	0.025237	-0.00211773	-0.00144259
	13:00:00	0.0194993	0.0623265	0.124993	0.203339	0.211783	0.166457	0.142518	0.139238	0.115869	0.0677039	0.0286021	0.0145581
	14:00:00	0.0403904	0.0939886	0.168529	0.238951	0.247521	0.213489	0.181631	0.18531	0.156658	0.105527	0.0519442	0.0321482
	15:00:00	0.0514544	0.114041	0.185166	0.246639	0.250858	0.235243	0.198537	0.193787	0.172562	0.13006	0.0648232	0.039849
	16:00:00	0.0550446	0.118656	0.181014	0.235624	0.243979	0.224372	0.211255	0.188534	0.17557	0.135233	0.0775105	0.0356325
	17:00:00	0.0514832	0.108662	0.163249	0.205085	0.219436	0.197748	0.195375	0.169814	0.159916	0.126233	0.0777485	0.0427461
	18:00:00	0.0506336	0.097132	0.13496	0.165415	0.180542	0.155793	0.15866	0.14792	0.137054	0.107289	0.0712278	0.0424331
	19:00:00	0.0430146	0.0750637	0.112487	0.135298	0.138135	0.120414	0.124716	0.120913	0.111831	0.0852454	0.0594283	0.0323841
	20:00:00	0.0282928	0.0480119	0.0884272	0.110178	0.101129	0.0977864	0.0964961	0.0939528	0.0882639	0.0624627	0.0394328	0.0163774
	21:00:00	0.0115864	0.0242299	0.0634252	0.0877119	0.0708845	0.0577333	0.0664487	0.0683547	0.0680058	0.0359762	0.0235838	0.00473818
	22:00:00	-0.00227725	0.00644634	0.0368261	0.053975	0.030881	0.0233507	0.0353163	0.0447168	0.0415584	0.0109699	0.000494297	-0.0116213
	23:00:00	-0.00968106	-0.0169024	0.00647698	0.0126717	-0.00154078	-0.0153738	0.0095736	0.0219055	0.00935917	-0.0190318	-0.0218293	-0.0216609
