# Supplementary material for: Long-term sea surface temperature time series from Malin Head, Ireland
Source: Copernicus journal article supplement (doi:10.5194/essd-18-333-2026), 2026-01-13
Supplement: Supplementary file [file essd-18-333-2026-supplement-title-page.pdf › essd-18-333-2026-supplement-title-page.pdf]

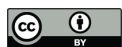

## *Supplement of*

# **Long-term sea surface temperature time series from Malin Head, Ireland**

**Sarah Daves et al.**

*Correspondence to:* Sarah Daves ([sgdaves@gmail.com](mailto:sgdaves@gmail.com))

- [essd-18-333-2026-supplement-title-page.pdf](#)
- [TableS1\\_with caption.xlsx](#)

The copyright of individual parts of the supplement might differ from the article licence.
